# Supplementary material for: Epoxy-Glass Microballoon Syntactic Foams: Rheological Optimization of the Processing Window
Source: Hindawi journal article supplement (doi:10.1155/2019/9180302), 2019-04-01
Supplement: f1 [file 9180302.f1.docx]

Supplementary Section

**Epoxy-glass microballoon syntactic foams: Rheological optimization of the processing window**

A.V.Ullasa,b, Devendra Kumar b, Prasun Kumar Roy a*

**S1: Calculation of the amount of hollow glass microballoons**

**….1**

where, and refer to the density and volume fraction of the constituent respectively, and the subscripts,‘HGM’, and ‘m’ refer to microballoons and epoxy respectively. For the purpose of calculation, density of epoxy has been assumed to be 1.17 g cc-1([1](#_ENREF_1)) respectively.

**Table S1: Compositional details of syntactic foam**

| Sample designation | Epoxy*  (g) | Microballoon (K 46) (g) | Sample designation | Epoxy*  (g) | Microballoon (K 15) loading (g) |
| --- | --- | --- | --- | --- | --- |
| **SF46-10** | 1.69 | 0.08 | **SF15-10** | 1.74 | 0.02 |
| **SF46-20** | 1.61 | 0.17 | **SF15-20** | 1.71 | 0.06 |
| **SF46-30** | 1.51 | 0.28 | **SF15-30** | 1.67 | 0.10 |
| **SF46-40** | 1.39 | 0.42 | **SF15-40** | 1.63 | 0.15 |
| **SF46-50** | 1.27 | 0.56 | **SF15-50** | 1.56 | 0.22 |
| **SF46-60** | 1.13 | 0.74 | **SF15-60** | 1.48 | 0.32 |
| **SF46-70** | 0.92 | 0.95 | **SF15-70** | 1.36 | 0.46 |

*Epoxy:hardener ratio = 100:13w/w


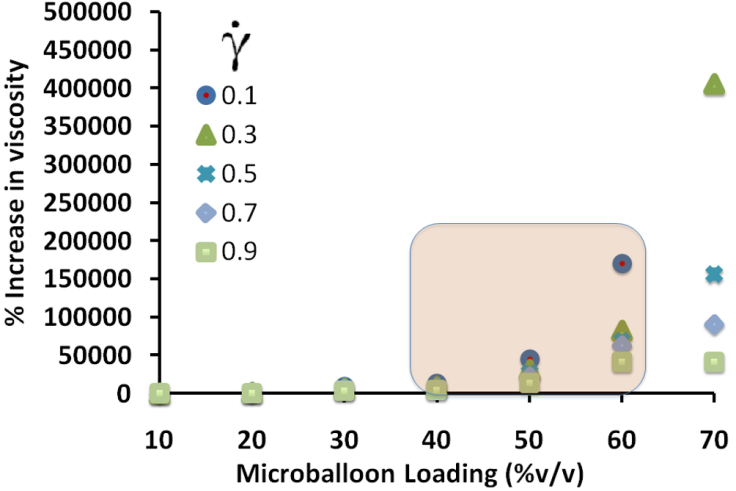


**Figure S1:** Increase in viscosity as a function of microballoon loading and shear rate ()


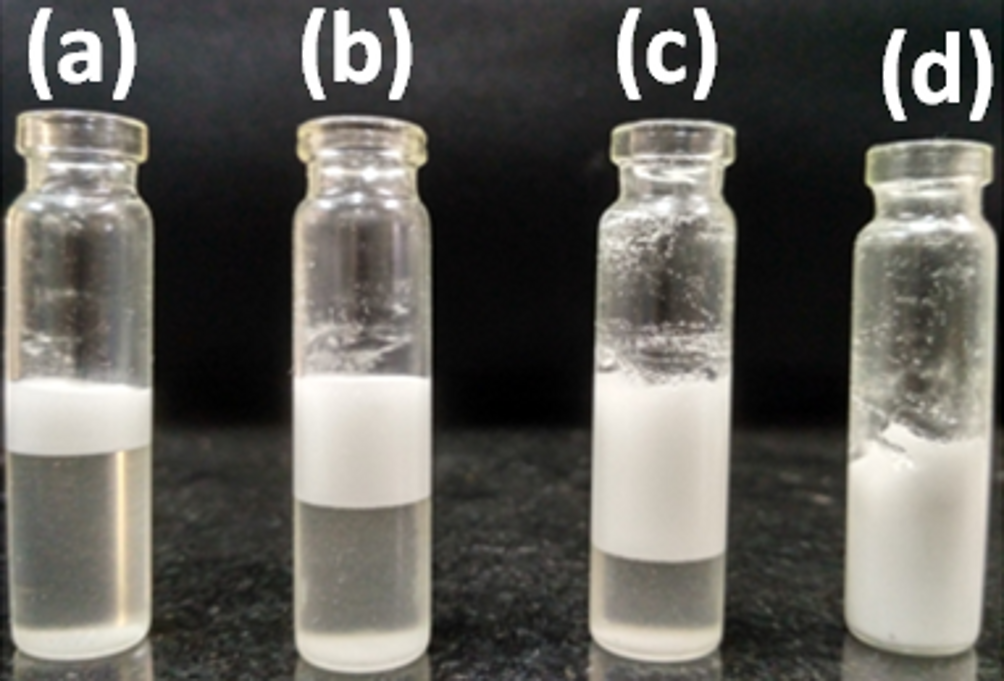


**Figure S2:** Drifting of microballoons to the surface of epoxy-HGM formulations with varying glass microballoon loading (a) 10, (b) 20, (c) 30 and (d) 40 %( v/v)

**S2: Activation energy calculation**([2](#_ENREF_2))

The activation energy for polymerization was calculated from the gelation time (Tgel) assuming that curing reaction can be expressed by differential equations containing unique apparent activation energy, as follows:

…………….2

Where A is a constant factor, Ea is apparent activation energy for the reaction, R is gas constant, T is the absolute isothermal cure temperature and is a function of the reaction mechanism and the extent of reaction and is assumed to be independent of the cure temperature.

Integrating equation 1 from by taking natural logarithm:

………....3

The extent of reaction at gelation point is constant, so the above equation can be expressed as:

…………..…4

Thus, from the slope of the plot of and the inverse of temperature, the activation energy can be calculated.

**Table S2:** Variation of gelation time (tgel) with temperature (T) and activation energy for syntactic foam compositions

| **Sample designation** | **Temperature (K)** | **tgel (s)** | **Activation energy (kJ/mol)** |
| --- | --- | --- | --- |
| ***Ep*** | 333 | 1662 | 55.9 |
| 353 | 559 |
| 373 | 190 |
| ***SF46-40*** | 333 | 1980 | 55.4 |
| 353 | 708 |
| 373 | 229 |
| ***SF15-40*** | 333 | 2130 | 56.3 |
| 353 | 840 |
| 373 | 229 |


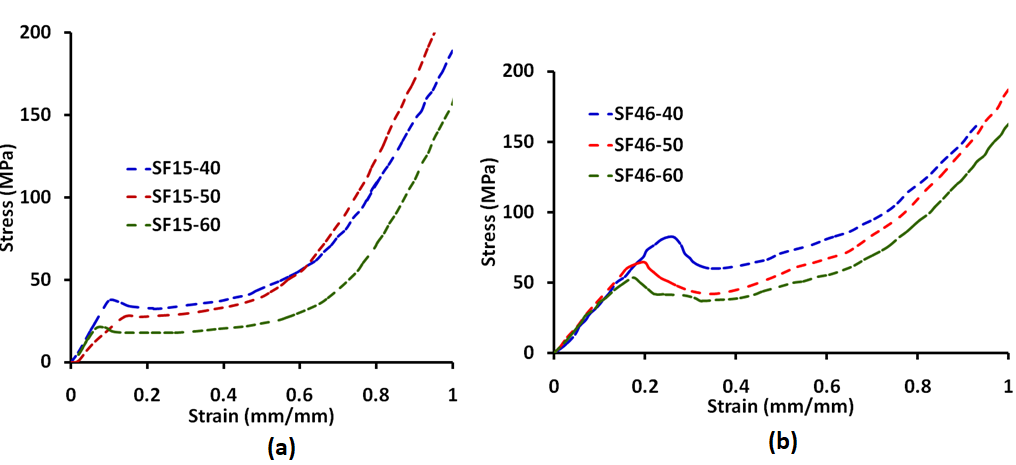


**Figure S3:** Representative compressive stress-strain curves of (a) SF15 and (b) SF46 syntactic foams


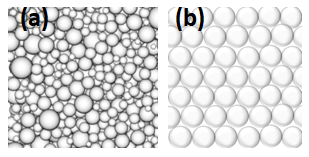


**Figure S4:** Close packing in syntactic foams (a) random packing (packing efficiency ~ 64%) (b) hexagonal close packing (packing efficiency ~ 74%)


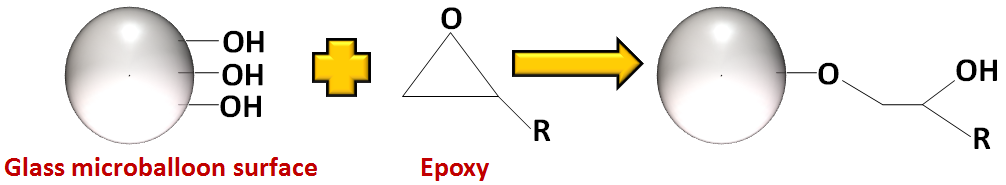


**Scheme S1:** Reaction of hydroxyl groups in glass with epoxy([3](#_ENREF_3))

1. Raghu P, Kunigal S, Larry R. Energy Absorption Performance of a Eco-Core - A Syntactic Foam. 48th AIAA/ASME/ASCE/AHS/ASC Structures, Structural Dynamics, and Materials Conference: American Institute of Aeronautics and Astronautics; 2007.

2. Fernández B, Corcuera MA, Marieta C, Mondragon I. Rheokinetic variations during curing of a tetrafunctional epoxy resin modified with two thermoplastics. European Polymer Journal 2001;37:1863-9.

3. Ku-Herrera JJ, Avilés F, Nistal A, et al. Interactions between the glass fiber coating and oxidized carbon nanotubes. Applied Surface Science 2015;330:383-92.
